# Supplementary material for: Efficient Presentation of Multiple Endogenous Epitopes to Both CD4+ and CD8+ Diabetogenic T Cells for Tolerance
Source: PubMed Central journal article supplement — Mol Ther Methods Clin Dev. 2016 Dec 24;4:27–38. doi: 10.1016/j.omtm.2016.12.002 (PMC5363322; doi:10.1016/j.omtm.2016.12.002), 2016-12-24
Supplement: mmc1.pdf [file mmc1.pdf]

**OMTM, Volume 4**

**Supplemental Information**

**Efficient Presentation of Multiple Endogenous  
Epitopes to Both CD4<sup>+</sup> and CD8<sup>+</sup> Diabetogenic  
T Cells for Tolerance**

**Shamael R. Dastagir, Jorge Postigo-Fernandez, Chunliang Xu, James H. Stoeckle, Rebuma Firdessa-Fite, and Rémi J. Creusot**

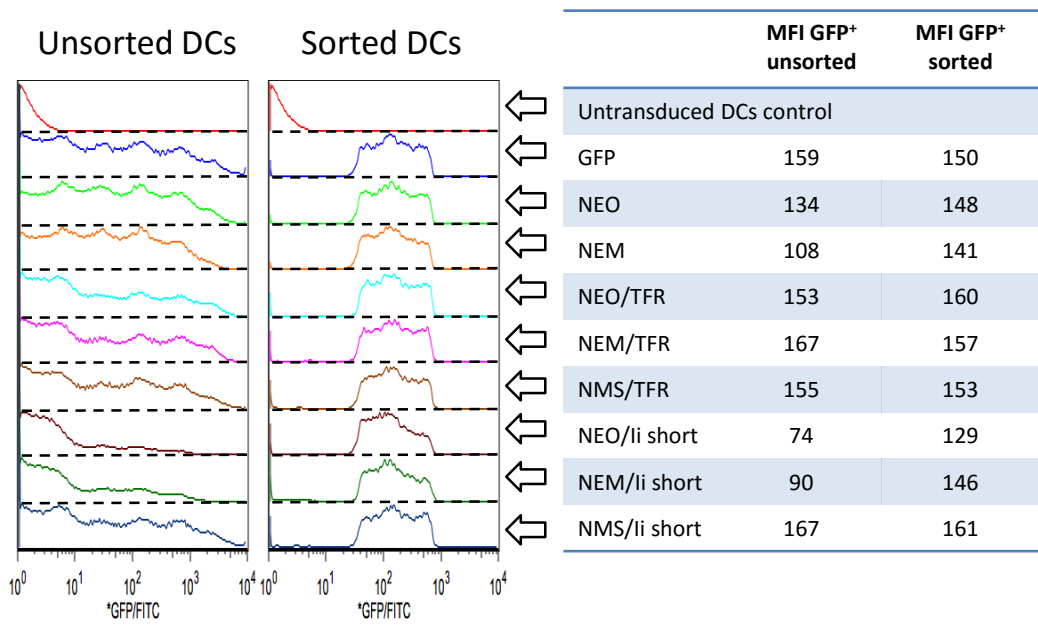

**Supplementary Figure S1. Sorting of DCs at intermediate GFP levels.** DCs were sorted 2 days after transduction such that all groups of DCs have a comparable level of transgene expression based on GFP MFI before co-culture with T cells. The data are representative of 4 experiments, wherein transduction efficiencies varied and was thereby corrected.

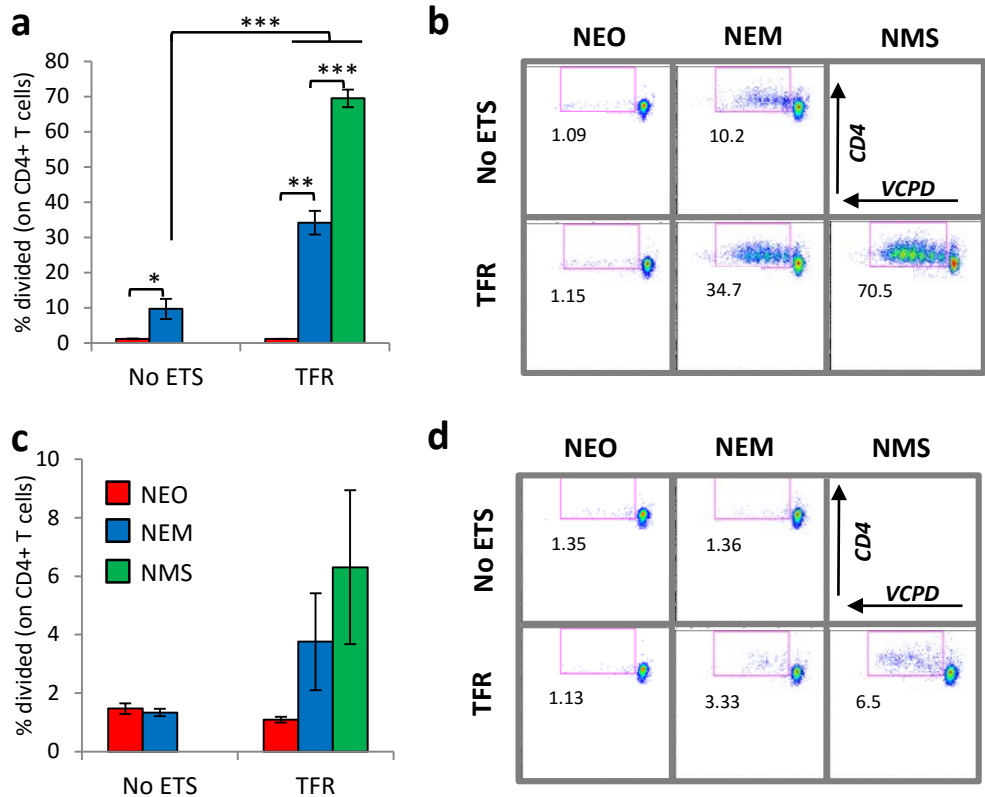

**Supplementary Figure S2. Stimulation of CD4<sup>+</sup> T cells from BDC2.5 mice (a,b) and BDC12-4.1 mice (c,d).** DCs were lentivirally transduced to express constructs containing no ETS or TFR<sub>1-118</sub> ETS. Stimulation was measured by T cell division. (a,c) Mean ±SD from three technical replicates. T-test analysis: \* p<0.05; \*\* p<0.01; \*\*\* p<0.005. (b,d) Representative FACS plots of Violet Cell Proliferation dye versus CD4.

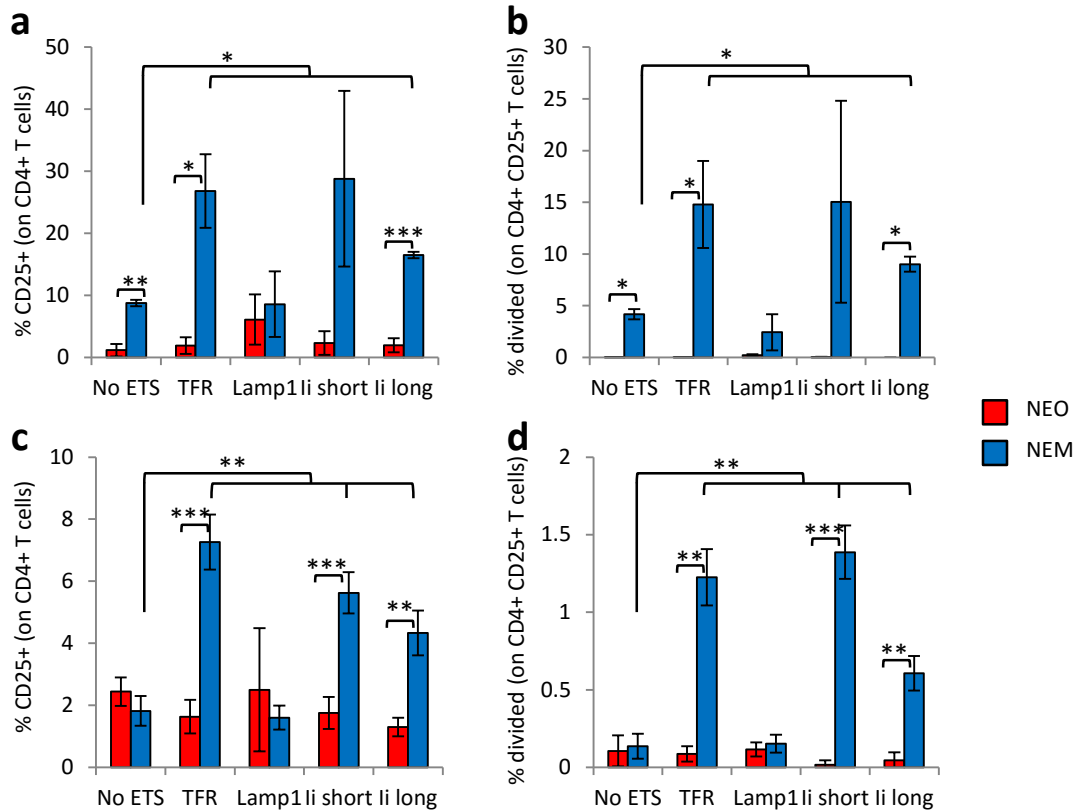

**Supplementary Figure S3. Stimulation of CD4<sup>+</sup> T cells from BDC2.5 mice (a,b) and BDC12-4.1 mice (c,d).** DCs were lentivirally transduced to express constructs containing no ETS or one of four tested TS. Stimulation was measured by CD25 upregulation (a,c) and T cell division (b,d). Data show the mean  $\pm$ SD from three technical replicates (a,b, representative of 3 out of 4 experiments) or five biological replicates (c,d, representative of four experiments). T-test analysis: \*  $p < 0.05$ ; \*\*  $p < 0.01$ ; \*\*\*  $p < 0.005$ .

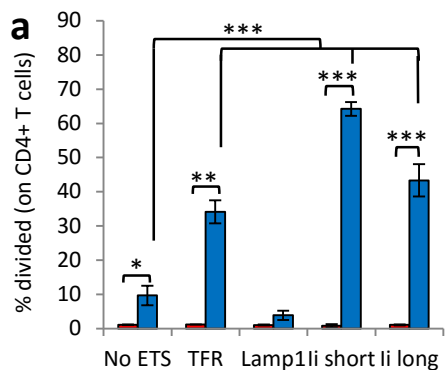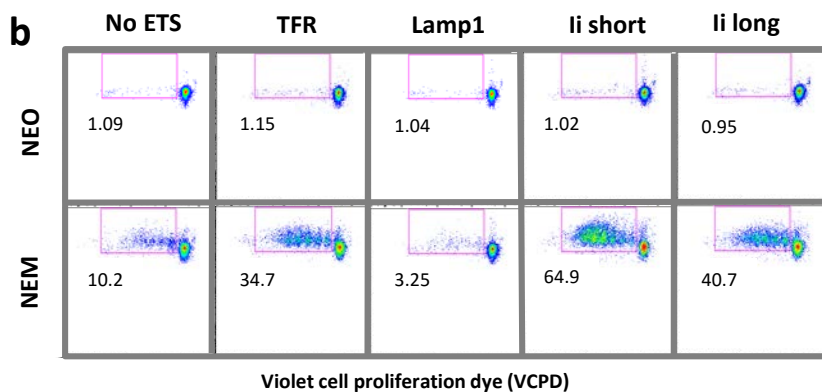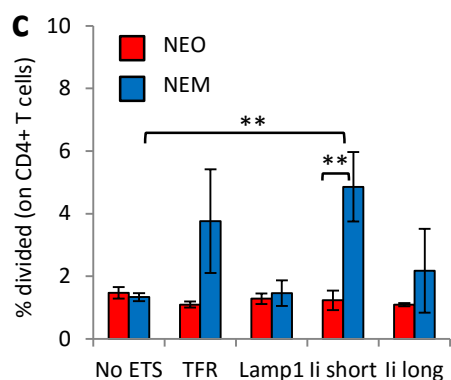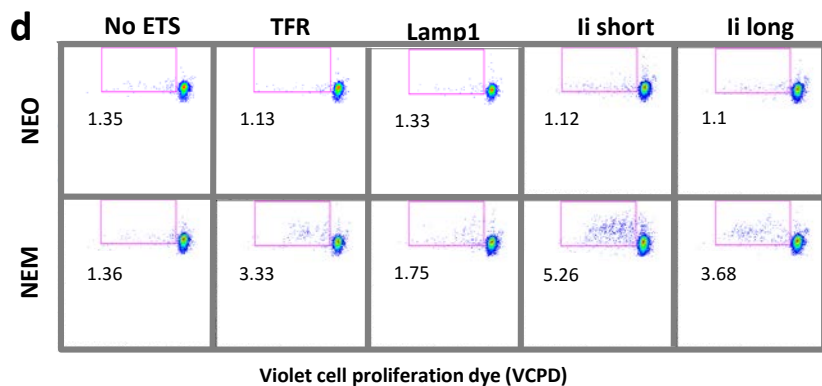

**Supplementary Figure S4. Stimulation of CD4<sup>+</sup> T cells from BDC2.5 mice (a,b) and BDC12-4.1 mice (c,d).** DCs were lentivirally transduced to express constructs containing no ETS or one of four tested TS. Stimulation was measured by T cell division. Data show the mean  $\pm$ SD from three technical replicates (a,c) and representative plots (b,d; CD4 on y axis). Data are representative of 3 out of 4 experiments (a,b) or 4 experiments (c,d). T-test analysis: \*  $p < 0.05$ ; \*\*  $p < 0.01$ ; \*\*\*  $p < 0.005$ .

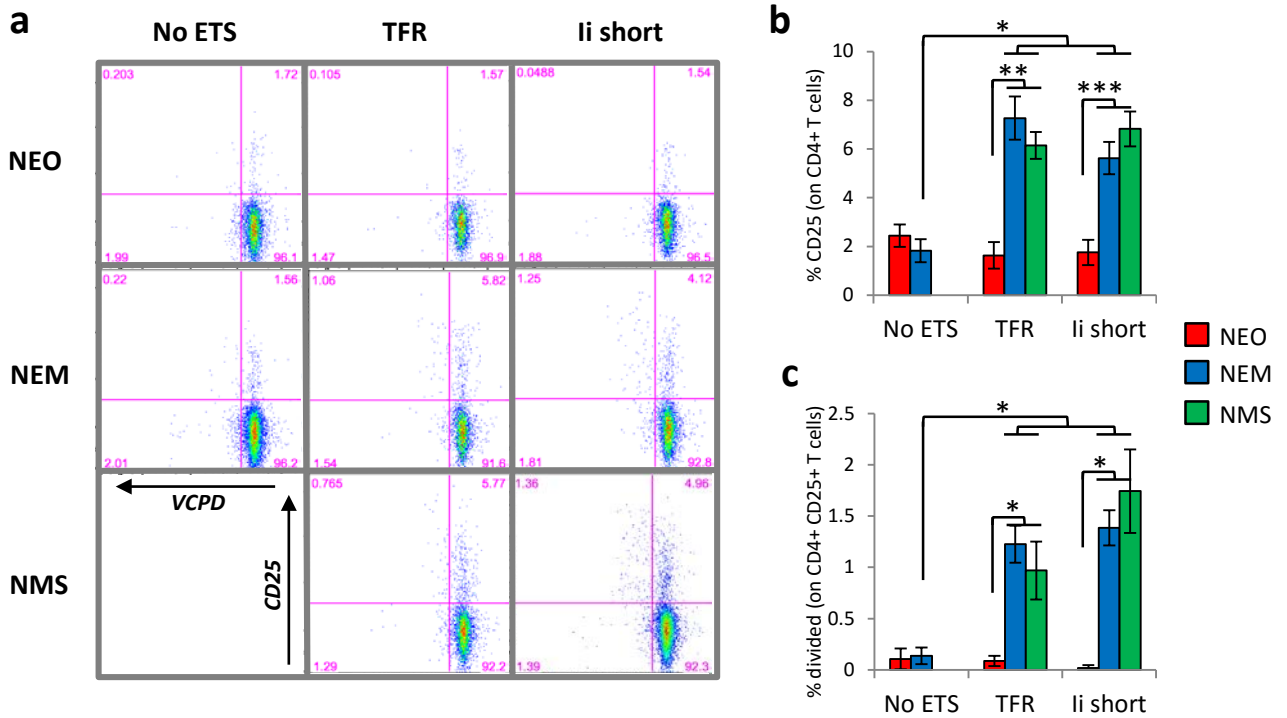

**Supplementary Figure S5. Stimulation of CD4<sup>+</sup> T cells from BDC12-4.1 mice.** DCs were lentivirally transduced to express constructs containing no ETS, TFR<sub>1-118</sub> ETS or li<sub>1-80</sub> ETS. Stimulation was measured by CD25 upregulation and T cell division. (a) Representative dot plots of Violet Cell Proliferation Dye against CD25. (b,c) Mean  $\pm$ SD (% CD25 on panel b; % divided on panel c) from at least three technical replicates (representative of four experiments, except NMS/li short, 2 experiments). T-test analysis: \*  $p < 0.05$ ; \*\*  $p < 0.01$ ; \*\*\*  $p < 0.005$ . Stimulation with latex beads coated with anti-CD3/CD28 gave >90% proliferation (not shown).

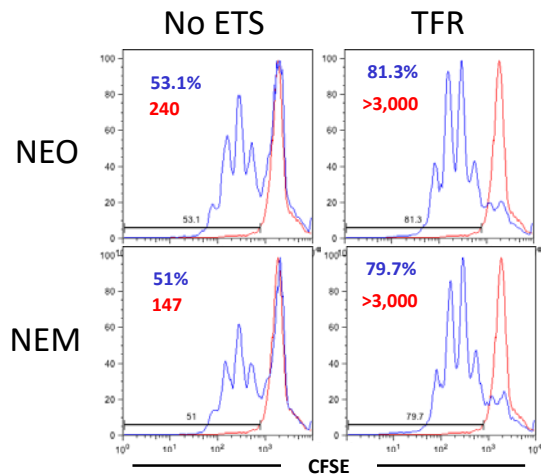

**Supplementary Figure S6. Stimulation of GAD65<sub>286-300</sub>-reactive CD4<sup>+</sup> T cells from G286 mice.** T cells were cultured for 3 days with transduced DCs (blue histograms) or untransduced DCs (red histograms). The percentage of divided T cells is indicated in blue, along with the concentration of IL-2 measured (pg/ml) for each condition in red (the background IL-2 measured with untransduced DCs was 4 pg/ml). Stimulation of these T cells could only be performed once, as the only known colony for these mice, from which we obtained spleens, became lost before we could repeat the experiment.

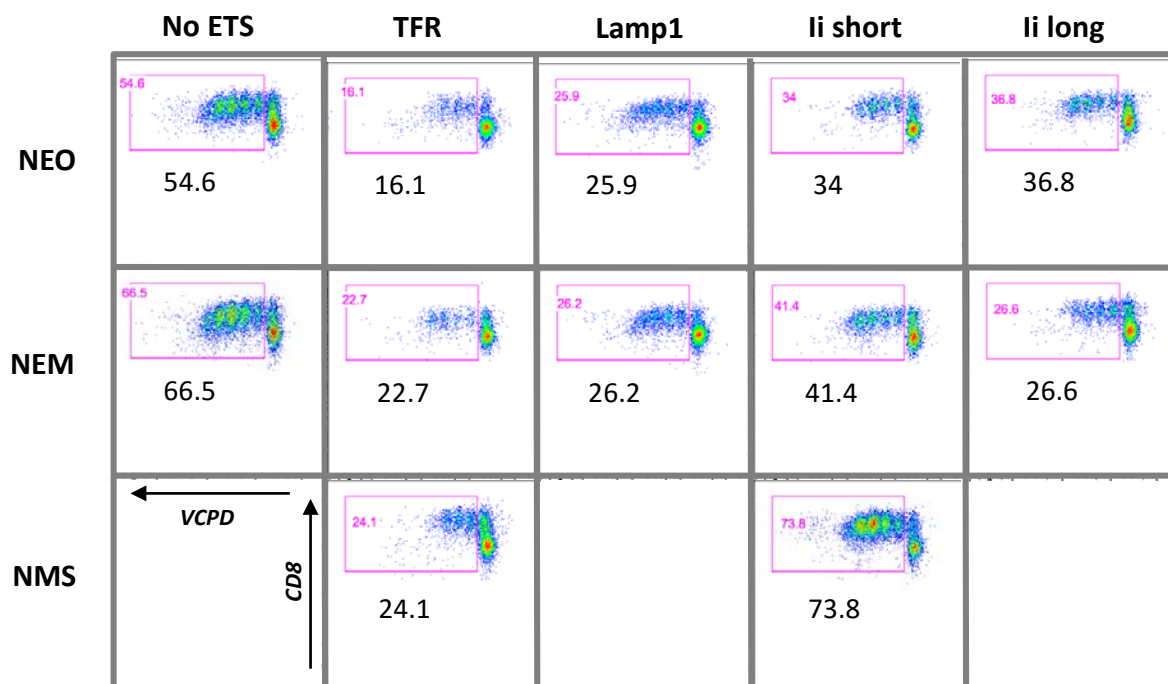

**Supplementary Figure S7. Stimulation of CD8<sup>+</sup> T cells from NY8.3 mice.** DCs were lentivirally transduced to express constructs containing no ETS or one of four tested TS. Stimulation was measured by T cell division. Representative dot plots are for the graphs shown in **Fig. 3c,d**.



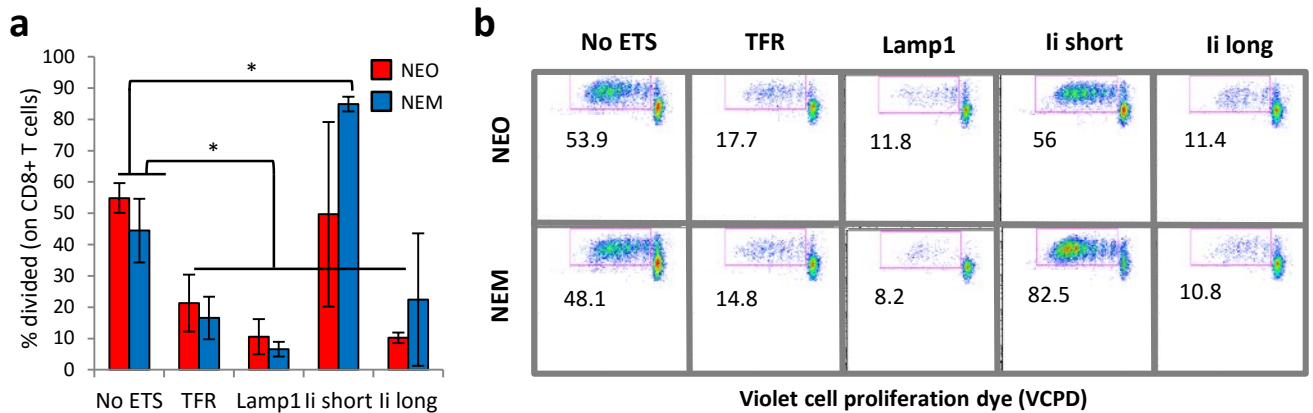

**Supplementary Figure S8. Stimulation of CD8<sup>+</sup> T cells from NY8.3 mice.** DCs were lentivirally transduced to express constructs containing no ETS or one of four tested TS. Stimulation was measured by T cell division. **(a)** Mean  $\pm$ SD from three technical replicates (representative of 3 out of 5 experiments). T-test analysis: \*  $p < 0.05$ . **(b)** Representative plots (CD8 on y axis).

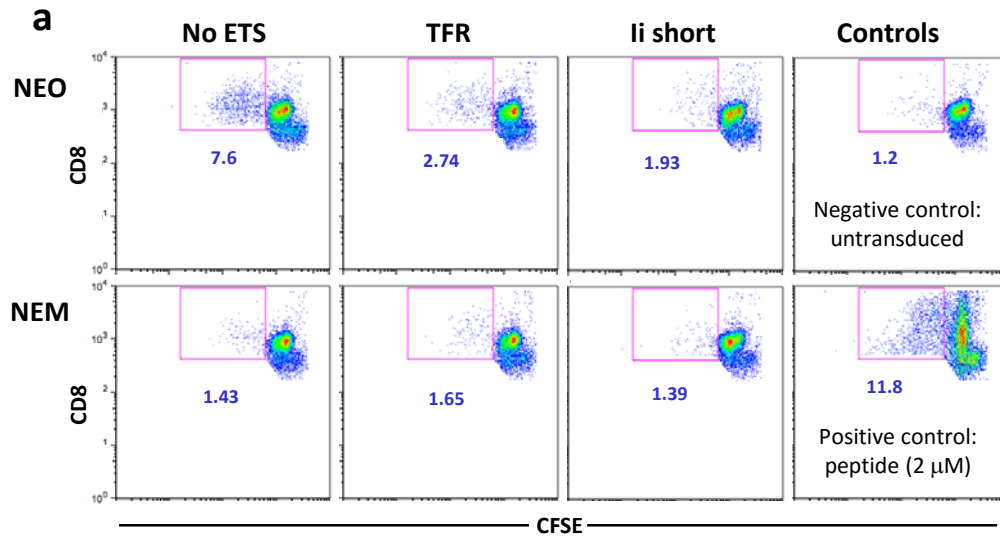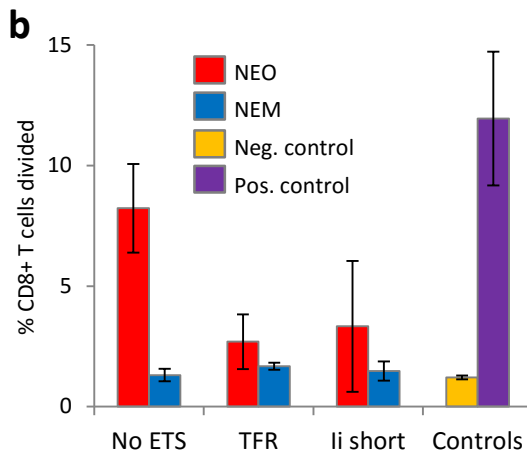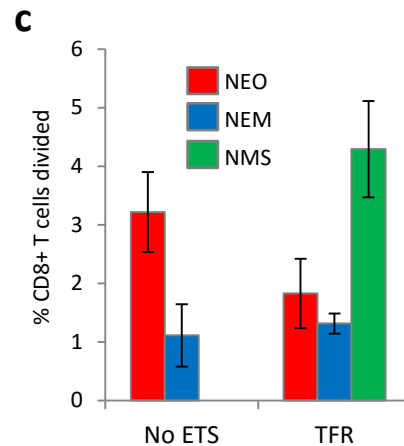

**Supplementary Figure S9. Stimulation of CD8<sup>+</sup> T cells from G9C8 mice.** DCs were lentivirally transduced with tandem epitope constructs containing no ETS, TFR<sub>1-118</sub> ETS or li<sub>1-80</sub> ETS. (a) Percentage of divided CD8<sup>+</sup> T cells gated on live CD8<sup>+</sup> cells (representative plots for data depicted on panel b), using T cells isolated from a fresh G9C8 spleen shipped to us. Soluble peptide at 2 μM was used as positive control. (b) Mean ±SD from triplicate; T-test NEO vs NEM: p<0.05, NEO vs NEO/TFR: p<0.05, NEO vs NEO/li short: p=0.069. (c) Data obtained using T cells isolated from frozen splenocytes; mean ±SD from triplicate; T-test NEO vs NEM: p<0.05, NEO vs NEO/TFR: p=0.097, NEO vs NMS: p=0.23

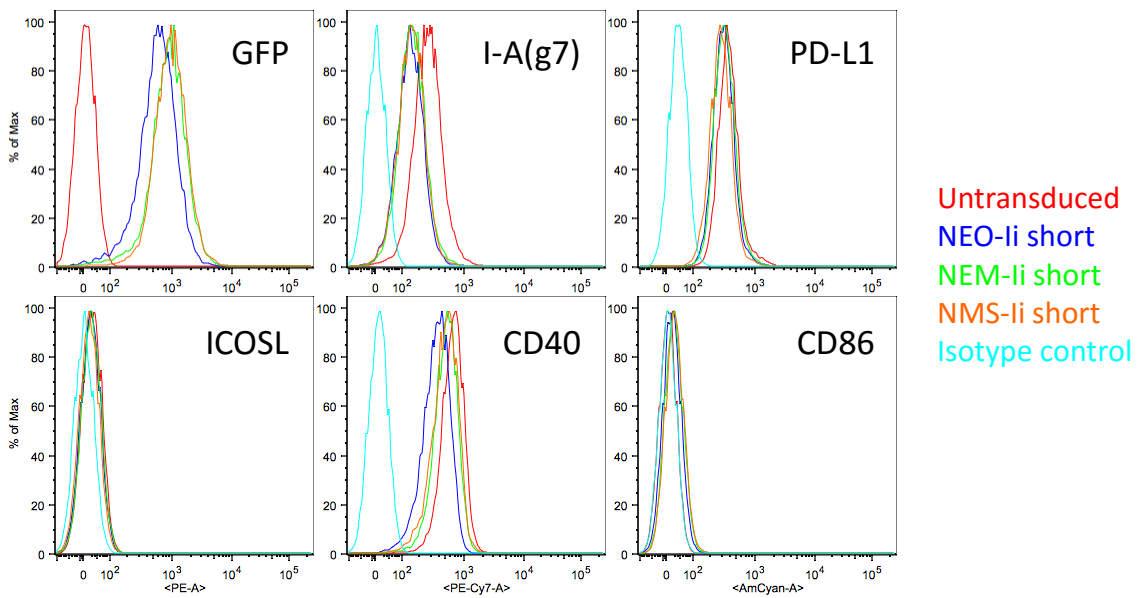

**Supplementary Figure S10. Phenotype of DAPg7 cells.** Expression of GFP and cell surface markers were compared between the original cell line (untransduced) and the modified, antigen-expressing lines (lines with the different constructs containing “li short” as ETS are shown as representative examples). All antibodies used were from Biolegend.

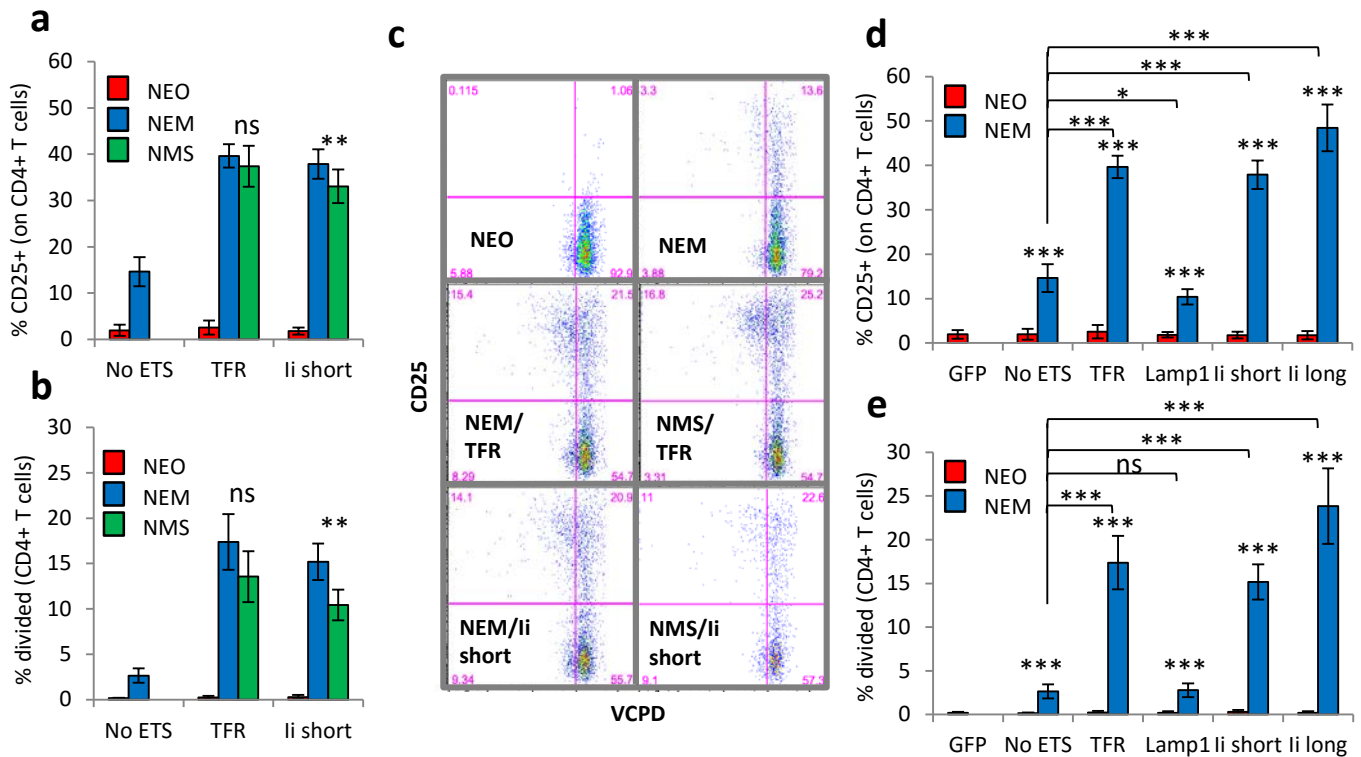

**Supplementary Figure S11. Stimulation of BDC12-4.1 (TCR $\alpha$ KO) CD4<sup>+</sup> T cells by transduced DAPg7 cells.**

Comparison of constructs with mixed epitopes (NEO, NEM) and segregated epitopes (NMS) for CD25 upregulation (a) and T cell division (b), with representative dot plots (c), gated on live CD4<sup>+</sup> singlets. Comparison of mixed epitope constructs (NEO and NEM) without or with four types of TS for CD25 upregulation (d) and T cell division (e). Data show the mean  $\pm$ SD from five biological replicates (five donor transgenic mice) and from one of three similar experiments. Paired T-test analysis: \*\*\* p<0.005.

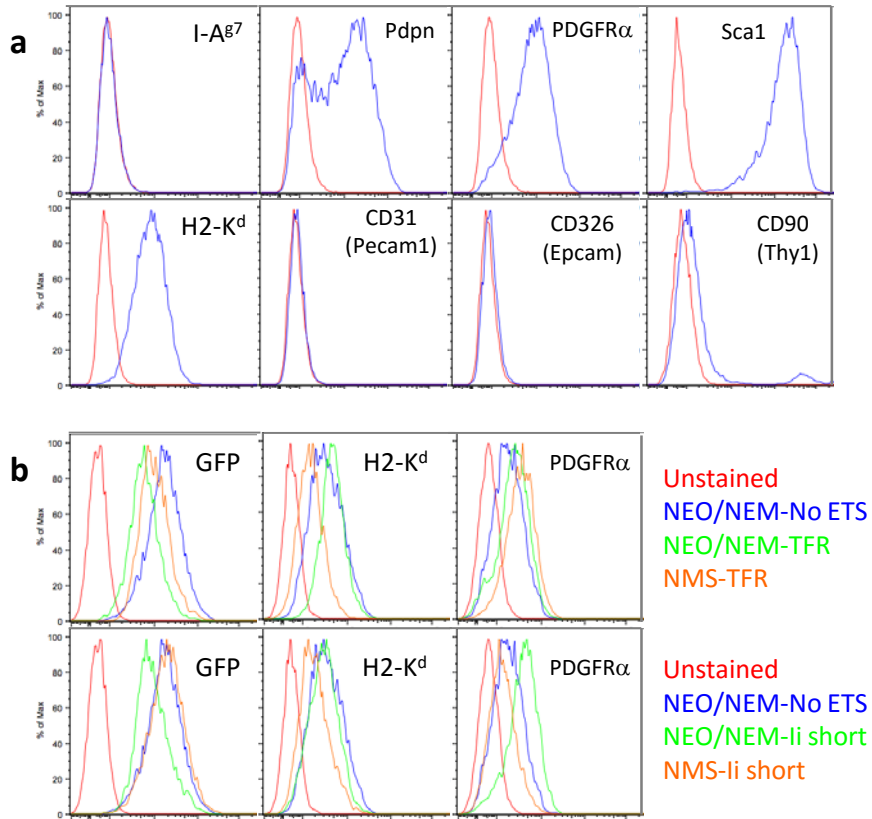

**Supplementary Figure S12. Phenotype of PCRC-5 cells.** (a) Expression of cell surface markers on PCRC-5 cells (red histograms: isotype control; blue histograms: specific marker staining). (b) Expression of GFP, K $^d$  and PDGFR $\alpha$  on transduced (antigen-expressing) PCRC-5 lines (selected lines shown as example). All antibodies used were from Biolegend.

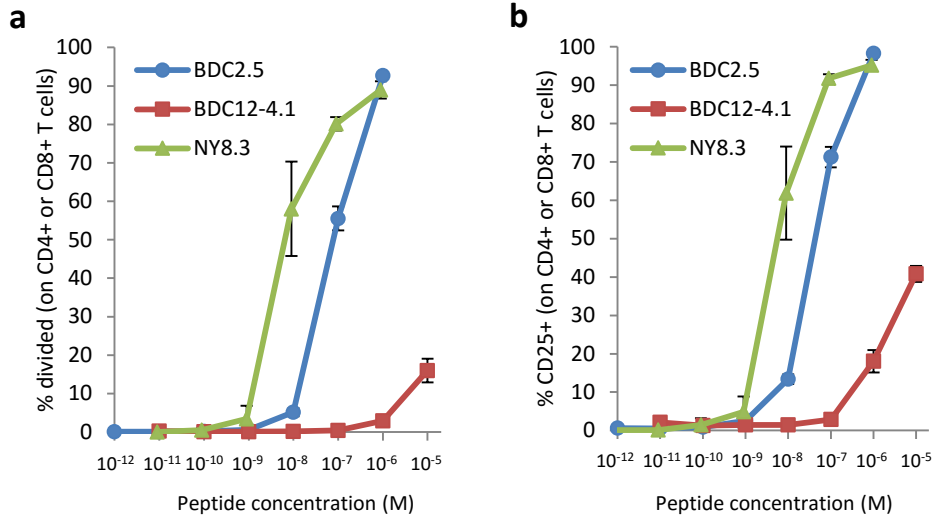

**Supplementary Figure S13. T cell responses to exogenous peptide titration on stromal cells.** T cell responses were measured as % divided cells (a) and % CD25<sup>+</sup> (b) using 1040-79 mimotope peptide (blue lines), InsB<sub>9-23</sub> R22E mimotope peptide (red lines) or IGRP<sub>206-214</sub> peptide (green lines) pulsed onto DAPg7 cells (blue and red lines) or PCRC-5 cells (green lines). Data show the mean ±SD from 3-5 biological replicates.

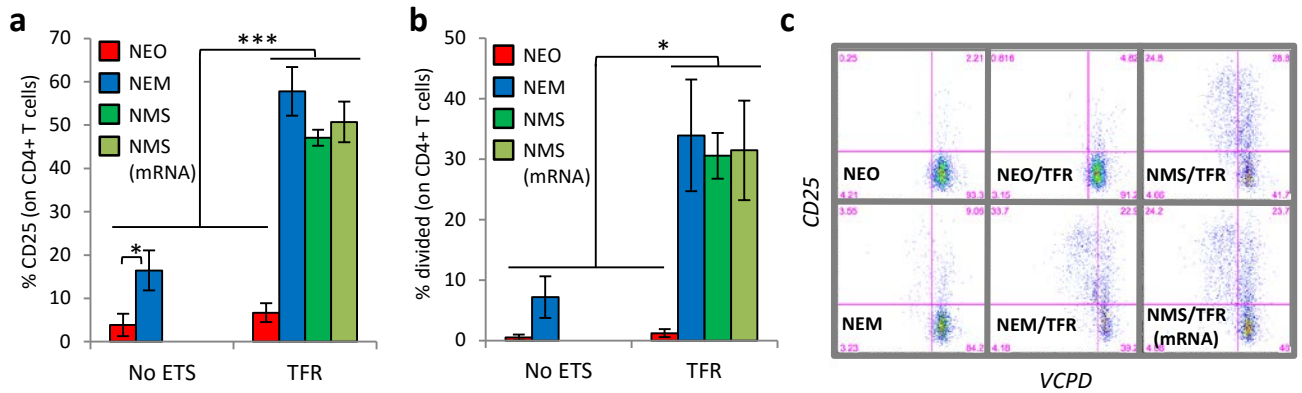

**Supplementary Figure S14. Comparison between transduction and mRNA electroporation for the stimulation of diabetogenic T cells by DCs *in vitro*.** The percentages of CD25<sup>+</sup> T cells (a) and of divided T cells (b) was measured 3 days after co-culture of CD4<sup>+</sup> T cells from BDC12-4.1.TCR $\alpha$ KO mice with transduced or transfected DCs (mean  $\pm$ SD from five biological replicates; T-test analysis: \*  $p < 0.05$ ; \*\*\*  $p < 0.005$ ). Representative dot plots are shown in panel c. DCs were either transduced with NMS/TFR LV were sorted based on intermediate GFP levels as before or electroporated with 1  $\mu$ g NMS/TFR mRNA /  $10^6$  cells.

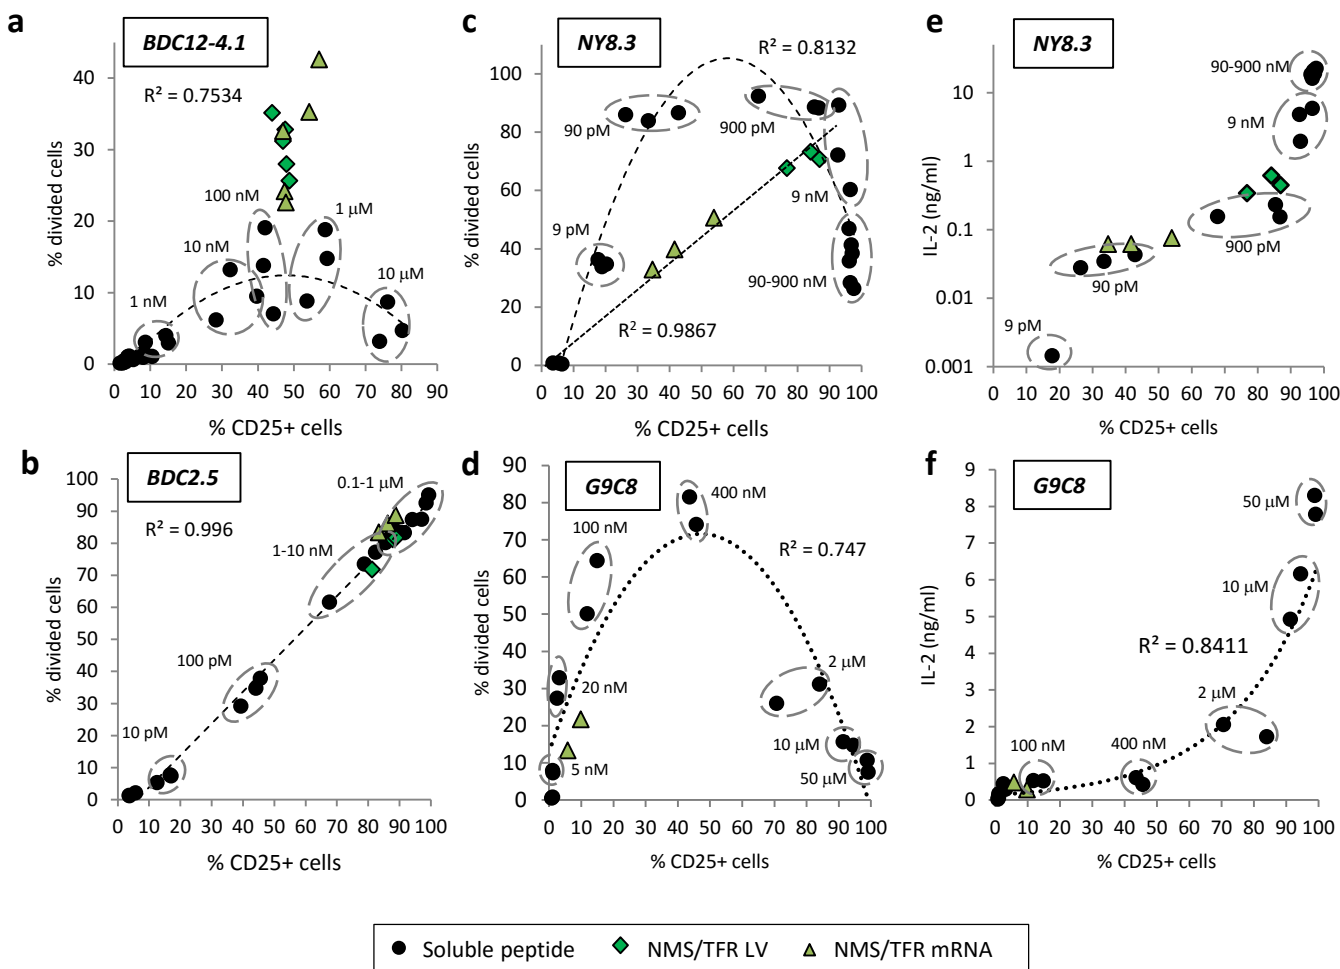

**Supplementary Figure S15. Comparison between endogenously expressed epitopes and exogenous peptides for the stimulation of diabetogenic T cells by DCs *in vitro*.** DCs were either transduced with NMS/TFR LV and sorted based on intermediate GFP levels as before, or electroporated with 1  $\mu$ g NMS/TFR mRNA /  $10^6$  cells. These DCs were used to stimulate T cells from BDC12-4.1.TCR $\alpha$ .KO mice (a), BDC2.5 mice (b) NY8.3 mice (c,e) and G9C8 mice (d,f), in parallel with control DCs pulsed with serial dilutions of exogenous peptide. Responses are plotted as % CD25<sup>+</sup> cells against % divided cells (gated on CD4<sup>+</sup> or CD8<sup>+</sup> T cells, panels a-b) or CD25<sup>+</sup> cells against IL-2 secretion (panels e,f). Each dot represents a biological replicate. Linear or polynomial trend lines with coefficient of correlation ( $R^2$ ) on panels a-d,f for the soluble peptide titration and on panel c for endogenous epitopes are indicated.



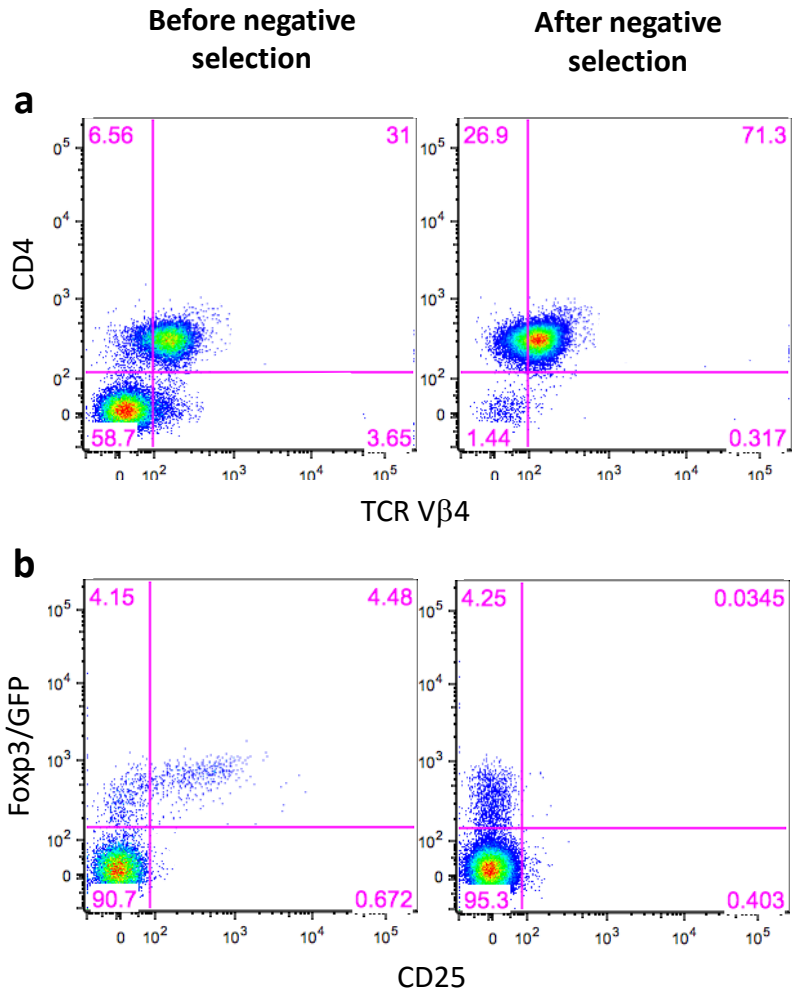

**Supplementary Figure S16. Isolation of BDC2.5.Foxp3/GFP CD4<sup>+</sup> T cells.** Our negative selection protocol can enrich CD4<sup>+</sup> T cells to more than 98% (a) with depletion of CD25<sup>+</sup> cells to less than 1% (b); however CD25<sup>-</sup> Foxp3<sup>low</sup> cells subsist.

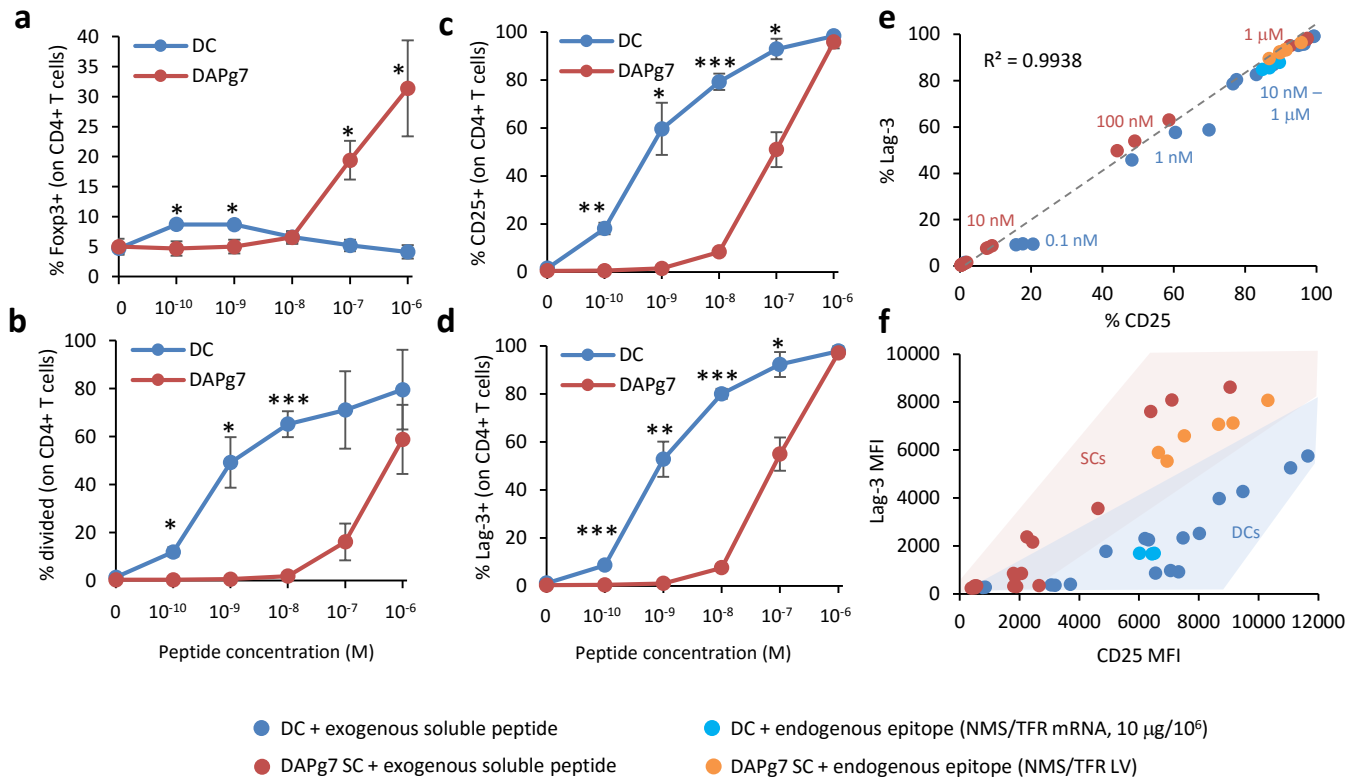

**Supplementary Figure S17. Stimulation of BDC2.5.Foxp3/GFP CD4<sup>+</sup> T cells with DCs and DAPg7 cells.** The T cell response to peptide-pulsed DCs and DAPg7 cells was measured in terms of % Foxp3/GFP<sup>+</sup> (a), % cell divided (b), % CD25<sup>+</sup> (c) and % Lag-3<sup>+</sup> (d), 3 days after co-culture (mean ±SD from three biological replicates, from one experiment representative of two); Paired T-test analysis: \* p<0.05; \*\* p<0.01; \*\*\* p<0.005). The % CD25<sup>+</sup> and % Lag-3<sup>+</sup> were plotted against each other in order to also display the response to endogenous epitopes (e), and showed a high correlation. In contrast, when CD25 MFI and Lag-3 MFI were plotted against each other, the responses separated based on APC type (higher Lag-3 expression with DAPg7 SCs), regardless of antigen source (exogenous or endogenous) (f).

## SUPPLEMENTARY TABLE

| Peptide              | Antigen  | Sequence                | MHC               | T cell | TCR       | Mouse     | Refs  |
|----------------------|----------|-------------------------|-------------------|--------|-----------|-----------|-------|
| <b>B:9-23</b>        | Ins2     | SHLVEALYLVCGERG         | I-A <sup>g7</sup> | CD4    | Vβ2       | BDC12-4.1 | 53    |
| <b>B:15-23</b>       | Ins2     | LYLVCGERG               | K <sup>d</sup>    | CD8    | Vβ6 Vα18  | G9C8      | 48    |
| <b>B:9-23 (R22E)</b> | Mimotope | SHLVEALYLVCGE <b>EG</b> | I-A <sup>g7</sup> | CD4    | Vβ2       | BDC12-4.1 | 25,26 |
| <b>358-371</b>       | ChgA     | <b>WSRMDQLAKELTAE</b>   | I-A <sup>g7</sup> | CD4    | Vβ4 Vα1   | BDC2.5    | 28    |
| <b>1040-79</b>       | Mimotope | AVPPL <b>WVR</b> ME     | I-A <sup>g7</sup> | CD4    | Vβ4 Vα1   | BDC2.5    | 8,9   |
| <b>206-214</b>       | IGRP     | VYLKTNVFL               | K <sup>d</sup>    | CD8    | Vβ8.1 Vα1 | NY8.3     | 54    |
| <b>286-300</b>       | GAD65    | KKGAAALGIGTDSVI         | I-A <sup>g7</sup> | CD4    | Vβ1 Vα4.5 | G286      | 49    |

**Supplementary Table 1. Epitopes expressed, their source β cell antigen (or mimotope), their sequence, and their MHC restriction.** The mimotope for InsB<sub>9-23</sub> differ by a single amino acid that favors anchoring of the peptide in a specific configuration.<sup>25,26</sup> The mimotope for ChgA was identified by peptide library screen<sup>8</sup> and the important conserved amino acids are highlighted in bold. The T cell clones specific for each epitope are then indicated, whether they are CD4<sup>+</sup> or CD8<sup>+</sup>, their TCR usage and the TCR-transgenic mouse from which they are isolated.

## References

53. Jasinski, J.M., Yu, L., Nakayama, M., Li, M.M., Lipes, M.A., Eisenbarth, G.S., and Liu, E. (2006). Transgenic insulin (B:9-23) T-cell receptor mice develop autoimmune diabetes dependent upon RAG genotype, H-2g7 homozygosity, and insulin 2 gene knockout. *Diabetes* 55, 1978–1984.
54. Verdaguer, J., Schmidt, D., Amrani, A., Anderson, B., Averill, N., and Santamaria, P. (1997). Spontaneous autoimmune diabetes in monoclonal T cell nonobese diabetic mice. *J. Exp. Med.* 186, 1663–1676.
